# Supplementary material for: Disordered spinel cobalt oxide electrocatalyst for highly enhanced HER activity in an alkaline medium
Source: Royal Society of Chemistry journal article supplement (doi:10.1039/d2nj01879a), 2022-01-01
Supplement: d2nj01879a1.pdf [file d2nj01879a1.pdf]

## Electronic Supplementary Information (ESI)

### Disordered Spinel Cobalt Oxide Electrocatalyst for Highly Enhanced HER Activity in Alkaline Medium

Pandi Muthukumar,<sup>a,b</sup> Mehboobali Pannipara,<sup>c,d</sup> Abdullah G. Al-Sehemi,<sup>c,d</sup> Dohyun Moon\*<sup>e</sup>  
Savarimuthu Philip Anthony\*<sup>a</sup>

<sup>a</sup>)School of Chemical & Biotechnology, SASTRA Deemed University, Thanjavur-613401,  
Tamil Nadu, India. Fax: +914362264120; Tel: +914362264101; E-mail:

[philip@biotech.sastra.edu](mailto:philip@biotech.sastra.edu)

<sup>b</sup>)Department of Chemistry, Saveetha School of Engineering, Saveetha Institute of Medical  
and Technical Sciences, Saveetha University, Chennai – 600077, Tamil Nadu, India

<sup>c</sup>)Department of chemistry, King Khalid University, Abha 61413, Saudi Arabia.

<sup>d</sup>)Research center for Advanced Materials Science, King Khalid University, Abha 61413,  
Saudi Arabia.

<sup>e</sup>)Beamline Department, Pohang Accelerator Laboratory, 80 Jigokro-127beongil, Nam-gu,  
Pohang, Gyeongbuk, Korea, Email: [dmoon@postech.ac.kr](mailto:dmoon@postech.ac.kr)

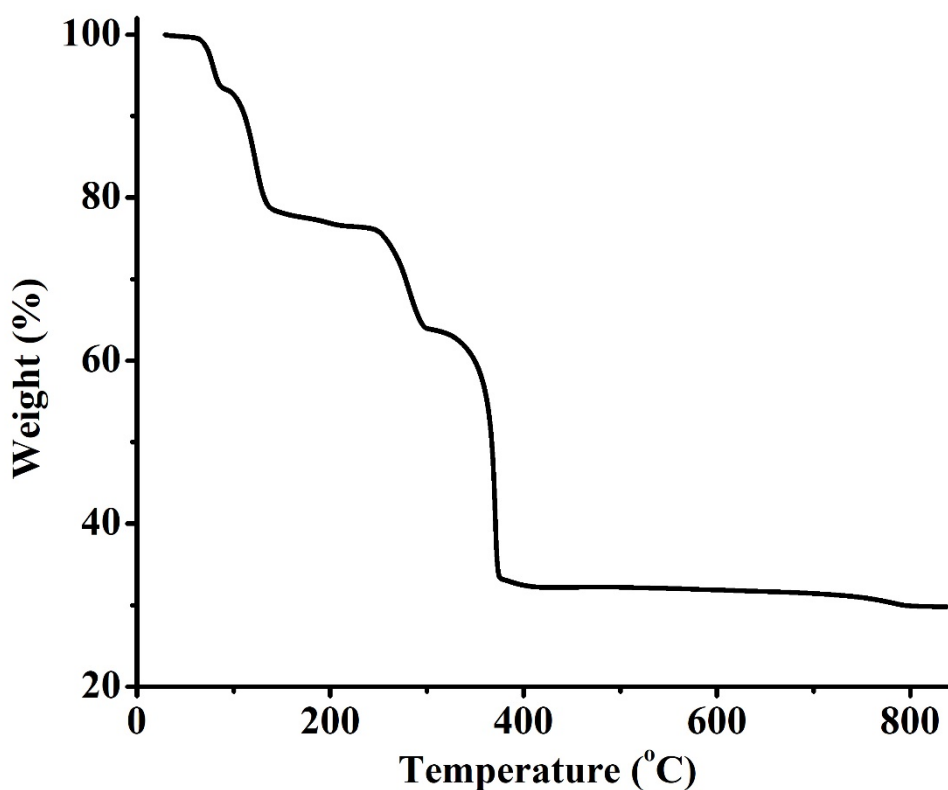

Figure S1. TGA analysis of Co(NO<sub>3</sub>)<sub>2</sub>.

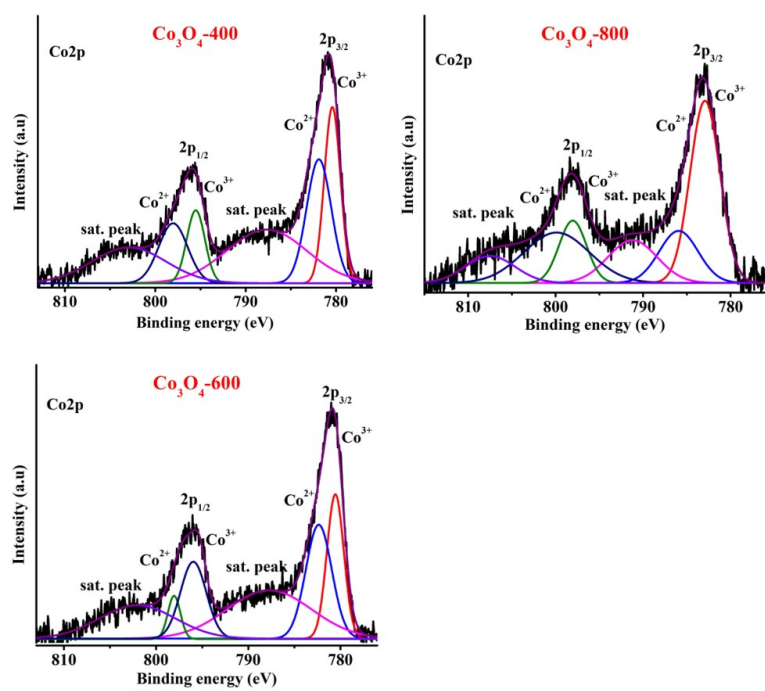

Figure S2. Deconvoluted XPS spectra of Co<sup>2+</sup>.

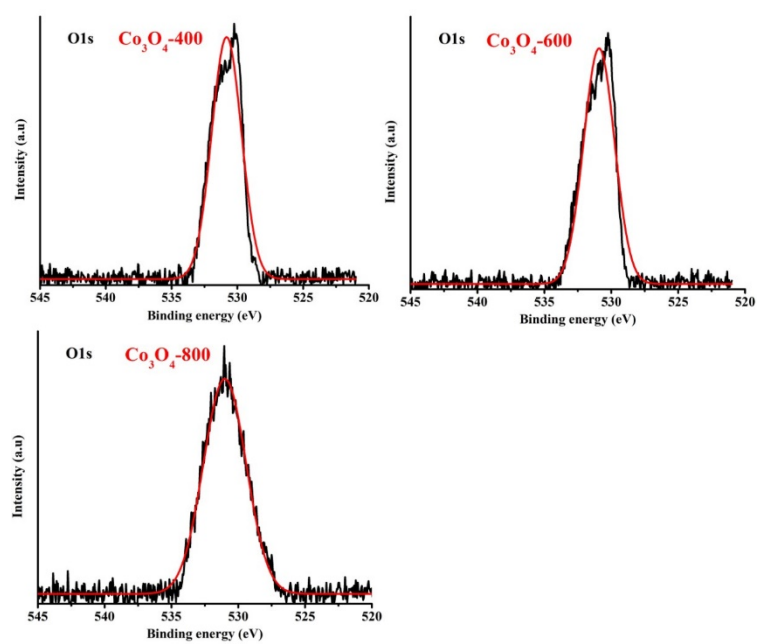

Figure S3. Deconvoluted XPS spectra of O1s.

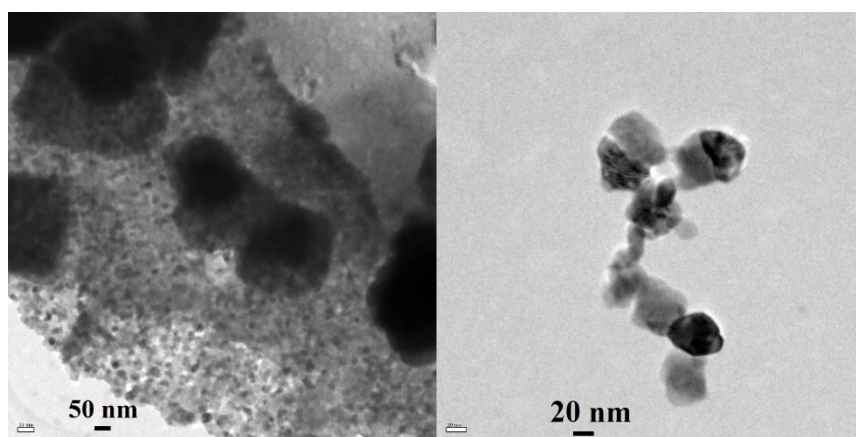

Figure S4. HR-TEM images of Co<sub>3</sub>O<sub>4</sub>-400.

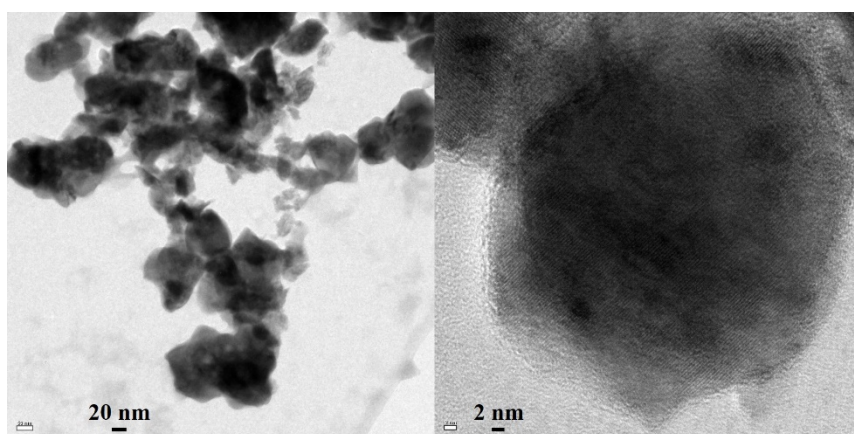

Figure S5. HR-TEM images of Co<sub>3</sub>O<sub>4</sub>-600.

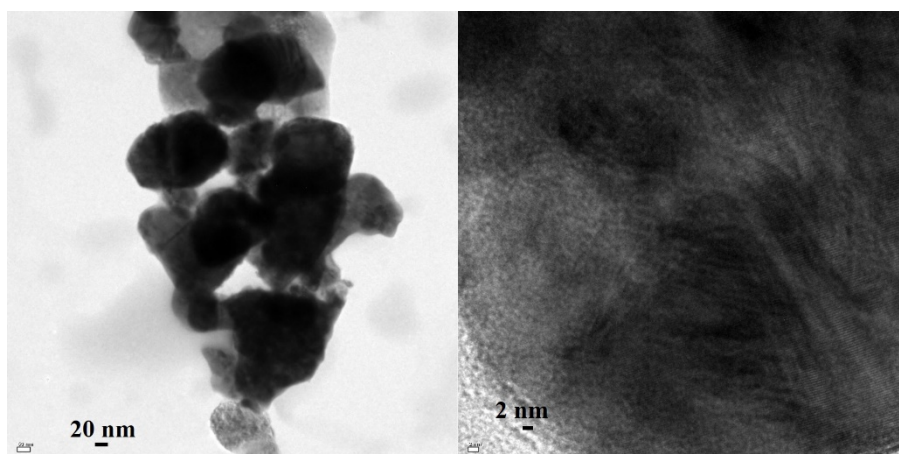

Figure S6. HR-TEM images of Co<sub>3</sub>O<sub>4</sub>-800.

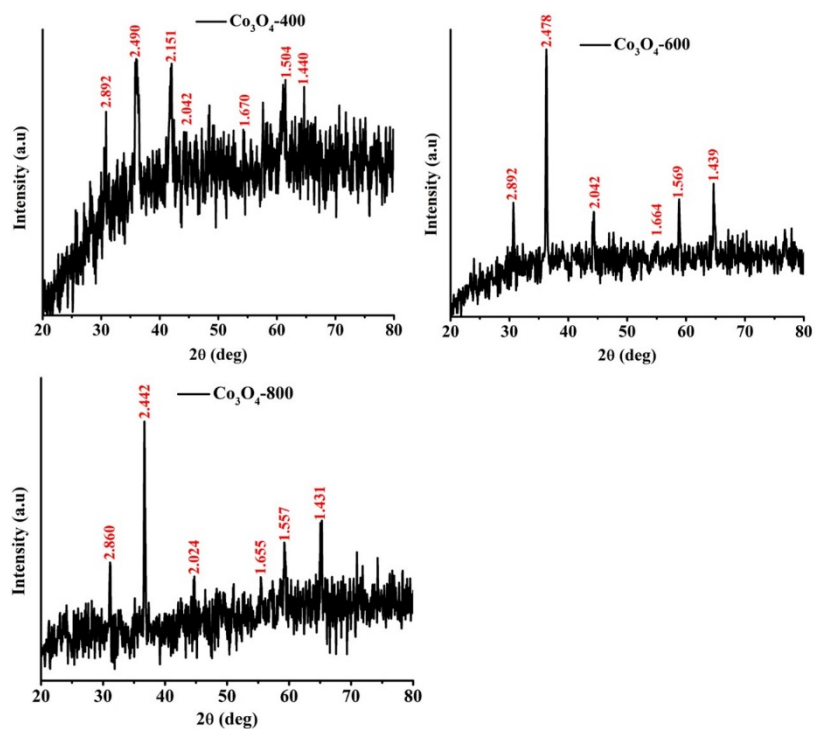

Fig. S7. PXRD pattern of  $\text{Co}_3\text{O}_4$  along with d-spacing.

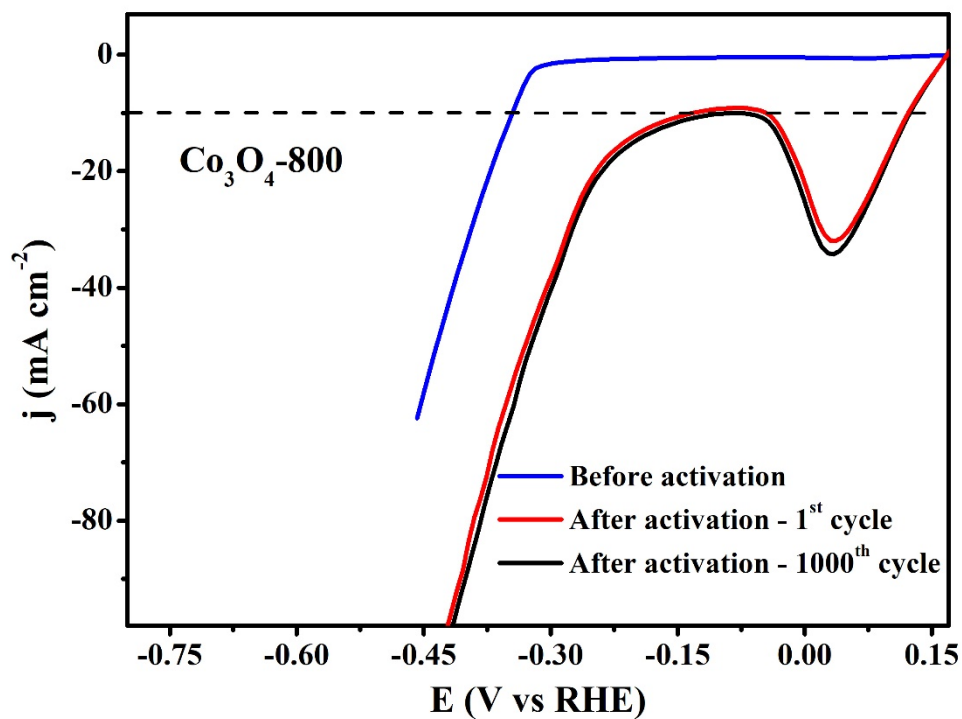

Fig. S8. HER Polarization curve of  $\text{Co}_3\text{O}_4$ -800 before and after activation.

Table S1. Comparison of HER activity of Co<sub>3</sub>O<sub>4</sub>-800

| Catalyst                                                | Working electrode | Overpotential at 10 mA/cm <sup>2</sup> (mV) | Reference                                                                                                                                         |
|---------------------------------------------------------|-------------------|---------------------------------------------|---------------------------------------------------------------------------------------------------------------------------------------------------|
| <b>Co<sub>3</sub>O<sub>4</sub></b>                      | <b>GCE</b>        | <b>93</b>                                   | <b>This work</b>                                                                                                                                  |
| Co <sub>3</sub> O <sub>4</sub>                          | CC                | 297                                         | J. Du, C. Li and Q. Tang, <i>Electrochim Acta</i> , 2020, <b>331</b> .                                                                            |
| Co <sub>3</sub> O <sub>4</sub>                          | NF                | 71                                          | H. Zhang, J. Zhang, Y. Li, H. Jiang, H. Jiang and C. Li, <i>J. Mater. Chem. A</i> , 2019, <b>7</b> , 13506-13510.                                 |
| Co <sub>3</sub> O <sub>4</sub>                          | NF                | 225                                         | R. Li, D. Zhou, J. Luo, W. Xu, J. Li, S. Li, P. Cheng and D. Yuan, <i>J. Power Sources</i> , 2017, <b>341</b> , 250-256.                          |
| Co <sub>3</sub> O <sub>4</sub> crystals for (111) facet | NF                | 195                                         | L. Liu, Z. Jiang, L. Fang, H. Xu, H. Zhang, X. Gu and Y. Wang, <i>ACS Appl. Mater. Interfaces</i> , 2017, <b>9</b> , 27736-27744.                 |
| Octahedral Co <sub>3</sub> O <sub>4</sub> particles     | CF                | 77.9                                        | K. Wu, D. Shen, Q. Meng and J. Wang, <i>Electrochim Acta</i> , 2018, <b>288</b> , 82-90.                                                          |
| Co <sub>3</sub> O <sub>4</sub> nanocrystals             | CFP               | 380                                         | S. Du, Z. Ren, J. Zhang, J. Wu, W. Xi, J. Zhu and H. Fu, <i>Chem Commun.</i> , 2015, <b>51</b> , 8066-8069.                                       |
| Co <sub>3</sub> O <sub>4</sub> @N-CNT                   | CP                | 380                                         | T. Sharifi, E. Gracia-Espino, X. Jia, R. Sandstrom and T. Wagberg, <i>ACS Appl. Mater. Interfaces</i> , 2015, <b>7</b> , 28148-28155.             |
| Co <sub>3</sub> O <sub>4</sub> @NC                      | NF                | 106                                         | Y. Tang, X. Fang, X. Zhang, G. Fernandes, Y. Yang, D. Yan, X. Xiang and J. He, <i>ACS Appl. Mater. Interfaces</i> , 2017, <b>9</b> , 36762-36771. |
| Co/ Co <sub>3</sub> O <sub>4</sub>                      | NF                | 90                                          | X. Yan, L. Tian, M. He and X. Chen, <i>Nano Lett.</i> , 2015, <b>15</b> , 6015-6021.                                                              |
| Co@ Co <sub>3</sub> O <sub>4</sub> -NC                  | NF                | 221                                         | C. Bai, S. Wei, D. Deng, X. Lin, M. Zheng and Q. A. Dong, <i>J. Mater. Chem.</i> , 2017, <b>5</b> , 9533-9536                                     |
| Co/ Co <sub>3</sub> O <sub>4</sub> /NC                  | GCE               | 350                                         | M. Khalid, A. M. B. Honorato, H. Varela and L. Dai, <i>Nano Energy</i> , 2018, <b>45</b> , 127-135.                                               |

\*NF – Nickel Foam, \*CF – Cobalt Foam, \*CFP – Carbon Fibre Paper, \*CP – Carbon Paper, \*CC – Carbon Cloth, \*GCE – Glassy Carbon Electrode

\*Electrolyte – 1.0 M KOH (in all catalyst)

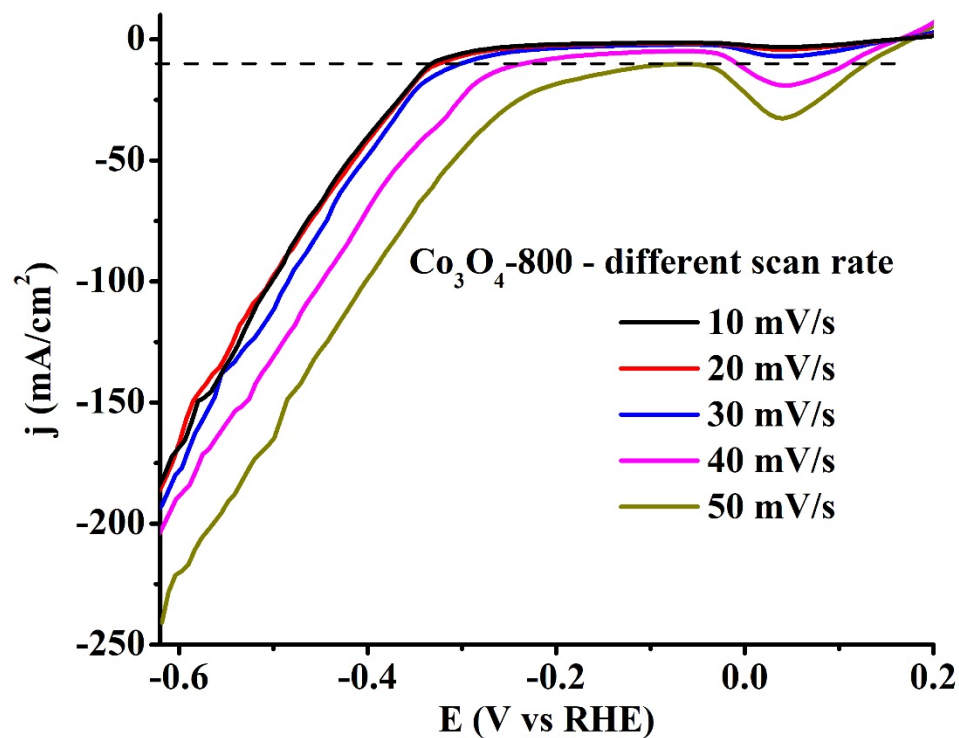

Fig. S9. HER Polarization curve of Co<sub>3</sub>O<sub>4</sub>-800 at different scan rate.

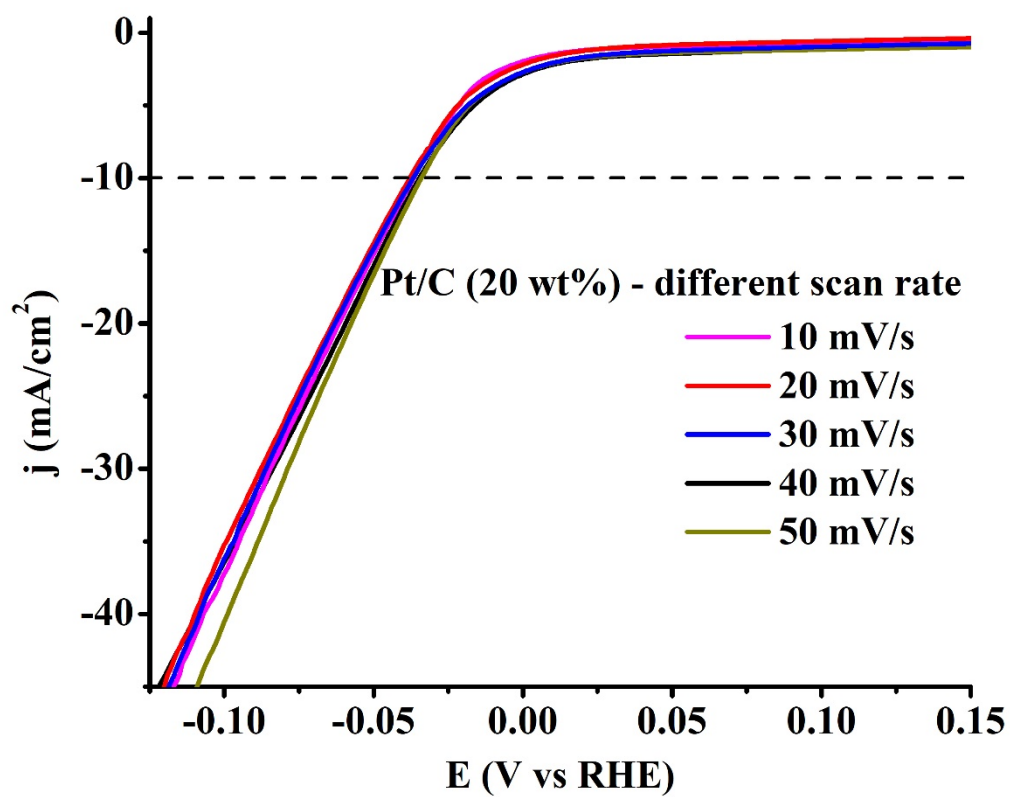

Fig. S10. HER Polarization curve of Pt/C at different scan rate.

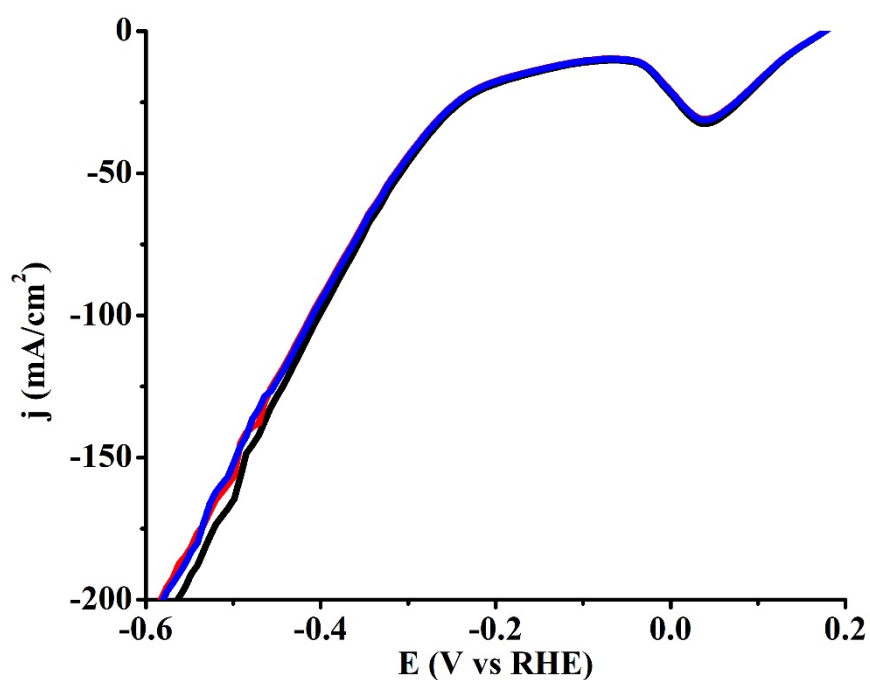

Fig. S11. HER Polarization curve of  $\text{Co}_3\text{O}_4$ -800 prepared at different batches.

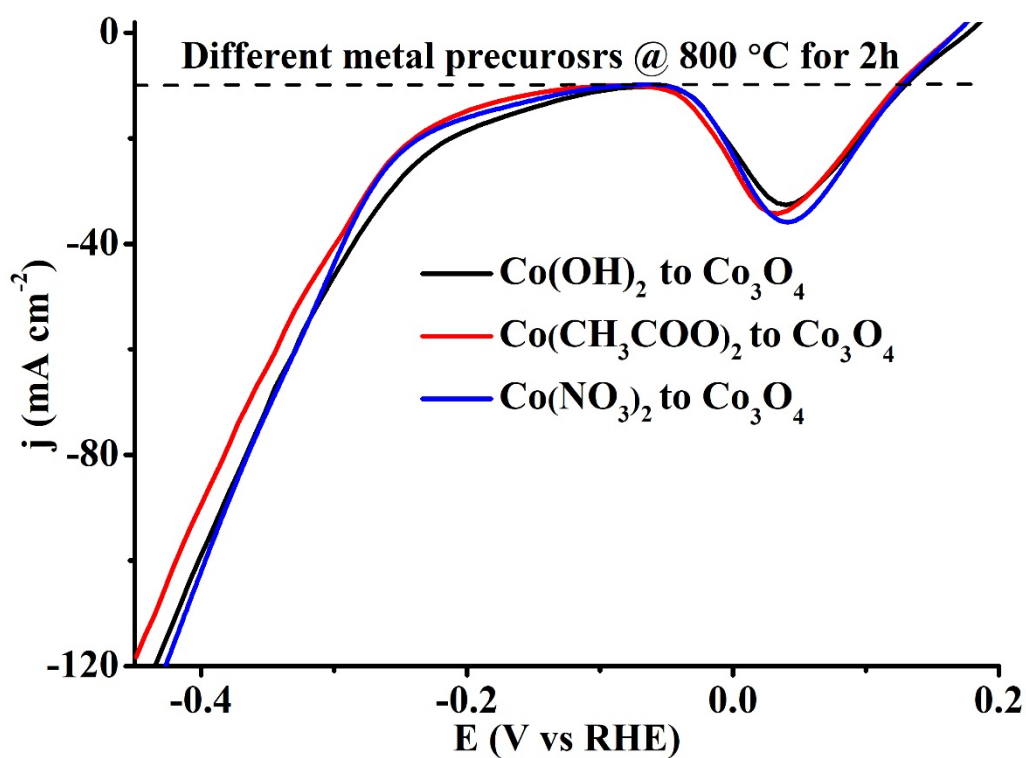

Fig. S12. HER Polarization curve of  $\text{Co}_3\text{O}_4$ -800 prepared at different precursors.
